# Supplementary material for: Adlay Testa (Coix lachryma-jobi L. var. Ma-yuen Stapf.) Ethanolic Extract and Its Active Components Exert Anti-Proliferative Effects on Endometrial Cancer Cells via Cell Cycle Arrest
Source: MDPI journal article supplement (doi:10.3390/molecules26071966), 2021-03-31
Supplement: s1 [file s1]

## Supplementary Materials:

(A)

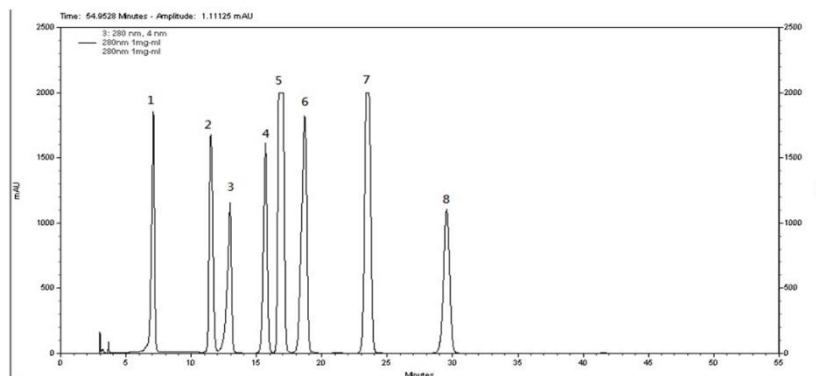

(B)

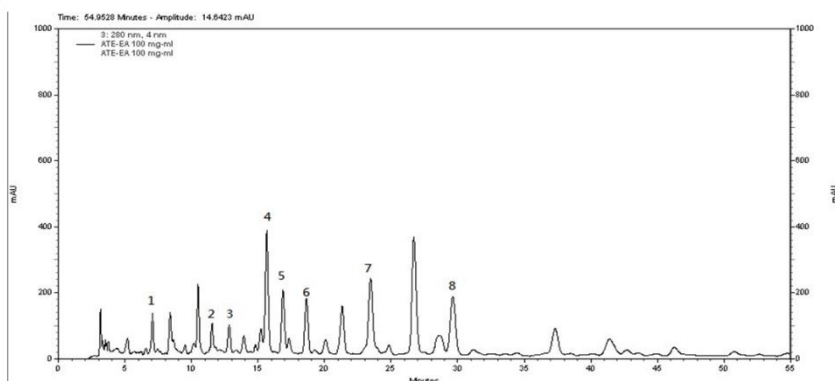

Figure S1. Chromatogram of a phenolic compounds (A) and ethyl acetate fraction of the adlay extract (ATE-EA) monitored at 280 nm. 1: protocatechnic acid. 2: o-hydroxybenzoic acid. 3: chlorogenic acid. 4: vanillic acid. 5: o-hydroxybenzaldehyde. 6: syringic acid. 7: vanillin. 8: syringaldehyde. 9: caffeic acid. 10: p-coumaric acid. 11: ferulic acid.

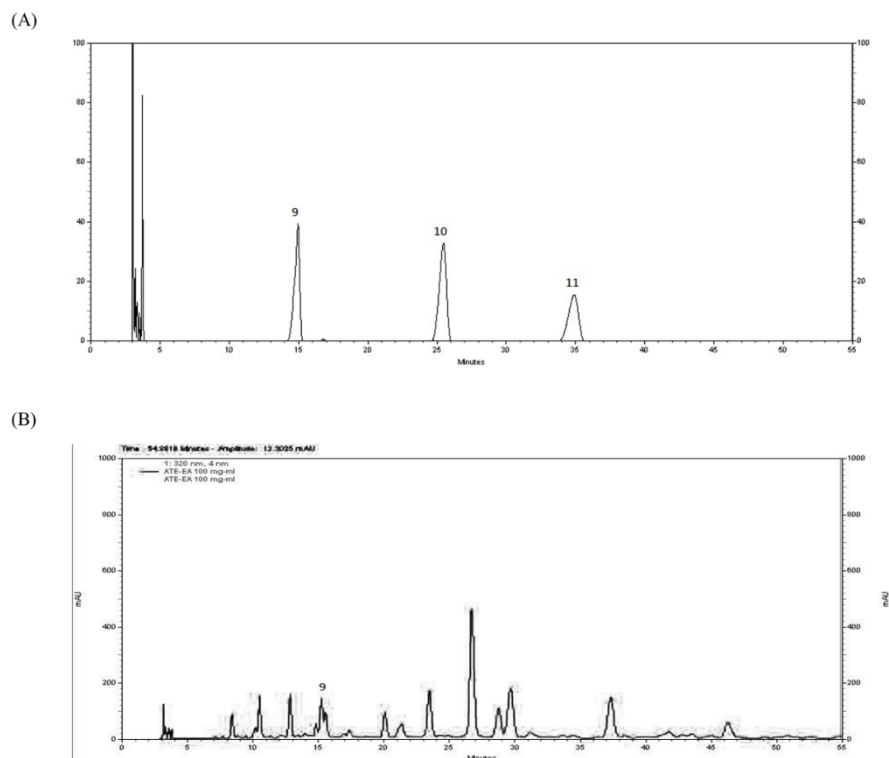

Figure S2. Chromatogram of a phenolic compounds (A) and ethyl acetate fraction of the adlay extract (ATE-EA) monitored at 320 nm. 1: protocathechin acid. 2: *o*-hydroxybenzoic acid. 3: chlorogenic acid. 4: vanillic acid. 5: *o*-hydroxybenzaldehyde. 6: syringic acid. 7: vanillin. 8: syringaldehyde. 9: caffeic acid. 10: *p*-coumaric acid. 11: ferulic acid.

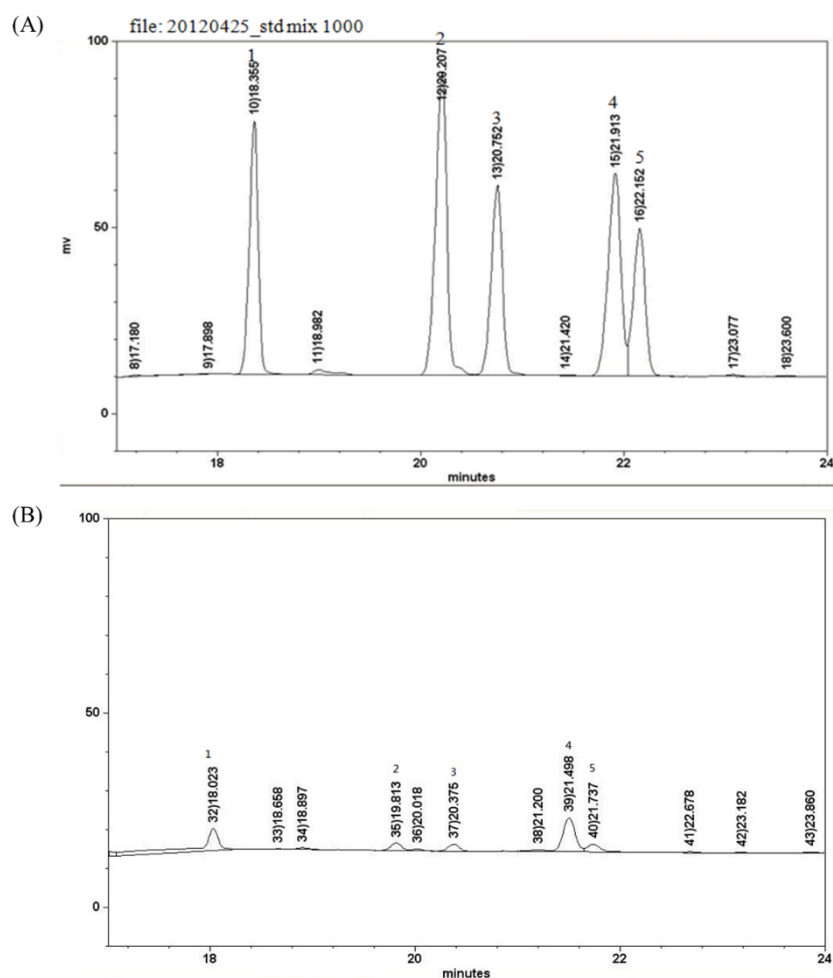

Figure S3. Peaks were identified from the retention times of standard compounds (A) and ethyl acetate fraction of the adlay extract (ATE-EA) (B). 1, cholesterol; 2, campesterol; 3, stigmasterol; 4,  $\beta$ -sitosterol; 5, stigmastanol. Cholesterol was used as the internal standard.

Table S1. Detection and quantification for the contents of fatty acid compounds from ATE-EA.

| Compound<br>(mg/g)                 | ATE-EA |
|------------------------------------|--------|
| 8:0 Caprylic acid                  | N.D.   |
| 10:0 Capric acid                   | N.D.   |
| 12:0 Lauric acid                   | N.D.   |
| 14:0 Myristic acid                 | N.D.   |
| 14:1 Myristoleic acid              | N.D.   |
| 16:0 Palmitic acid                 | 161    |
| 16:1 Palmitoleic acid              | N.D.   |
| 18:0 Stearic acid                  | 12     |
| 18:1 Oleic acid                    | 467    |
| 18:2 Linoleic acid                 | 345    |
| 18:3 $\gamma$ -linolenic acid      | N.D.   |
| 18:3 $\alpha$ -linolenic acid      | N.D.   |
| 20:0 Arachidic acid                | N.D.   |
| 20:1 Eicosaenoic acid              | N.D.   |
| 20:2 Eicosadienoic acid            | N.D.   |
| 20:3 $\gamma$ -Eicosatrienoic acid | N.D.   |
| 20:3 $\alpha$ -Eicosatrienoic acid | N.D.   |
| 20:4 Arachidonic acid              | N.D.   |
| 20:5 Eicosapentaenoic acid         | N.D.   |
| 22:0 Behenic acid                  | N.D.   |
| 22:1 Erucic acid                   | N.D.   |
| 22:2 Docosadienoic acid            | N.D.   |
| 22:4 Docosatetraenoic acid         | N.D.   |
| 22:5 Docosapentaenoic acid         | N.D.   |
| 22:6 Docosahexaenoic acid          | N.D.   |
| 24:0 Lignoceric acid               | N.D.   |
| 24:1 Nervonic acid                 | N.D.   |
| Others                             | 14     |

N.D.: Not detected.

Table S2. The retention time, regression equation and regression coefficient of the phenolic compounds.

| Compound                      | Retention time (min) | Regression equation         | Regression coefficient ( $r^2$ ) |
|-------------------------------|----------------------|-----------------------------|----------------------------------|
| 280nm                         |                      |                             |                                  |
| protocatechnic acid           | 7.02                 | $y=108568732.9x+1181073.69$ | 0.9999                           |
| <i>p</i> -hydroxybenzoic acid | 11.54                | $y=129553867.1x+2594215.43$ | 0.9981                           |
| chlorogenic acid              | 12.813               | $y=103073849.9x+355106.94$  | 0.9999                           |
| vanillic acid                 | 15.653               | $y=136177380.9x+929389.7$   | 0.9997                           |
| <i>p</i> -hydroxybenzaldehyde | 16.86                | $y=618704222.2x+582145.44$  | 0.9999                           |
| syringic acid                 | 18.627               | $y=199333462.7x+1678917.23$ | 0.9996                           |
| vanillin                      | 23.46                | $y=339212539x+305480.72$    | 0.9999                           |
| syringaldehyde                | 29.627               | $y=140613999.3x+769250.19$  | 0.9999                           |
| 320nm                         |                      |                             |                                  |
| caffeic acid                  | 15.173               | $y=309350875x+5427362.73$   | 0.9957                           |
| <i>p</i> -coumaric acid       | 25.893               | $y=382978154x+7472195.23$   | 0.9969                           |
| ferulic acid                  | 34.373               | $y=373821554.3x+1737533.3$  | 0.9997                           |

Table S3. The retention time, regression equation and regression coefficient of the flavonoid compounds.

| Compound                              | Retention time (min) | Regression equation      | Regression coefficient ( $r^2$ ) |
|---------------------------------------|----------------------|--------------------------|----------------------------------|
| Liquiritigenin                        | 7.1                  | $y=1615.17x+32171.73$    | 0.9856                           |
| Quercetin                             | 8.14                 | $y=89295.84x-1214520.38$ | 0.9879                           |
| Naringenin                            | 10.913               | $y=10218.08x-25052.23$   | 0.9976                           |
| Chrysoeriol                           | 12.207               | $y=67636.98x+31111.93$   | 0.9994                           |
| Quercetin-3,5,7,3',4-pentamethylether | 20.307               | $y=124605.57x-465334.24$ | 0.9891                           |
